# Supplementary material for: Chimeric mitochondrial RNA transcripts predict mitochondrial genome deletion mutations in mitochondrial genetic diseases and aging
Source: HighWire-hosted journal article supplement (doi:10.1101/gr.279072.124), 2024-11-27
Supplement: Supplemental_Figures.docx [file Supplemental_Figures.docx]

**Supplemental**

**Supplemental Figure 1: Chimeric mitochondrial RNA fusion sites correspond to mitochondrial DNA deletion breakpoints in Kearn Sayre Syndrome fibroblasts.** Shown is the kernel density of chimeric mitochondrial RNA fusion sites (top panels), the kernel density of mitochondrial DNA break points (middle panel) across the mitochondrial genome (annotated in bottom panel) for two fibroblast lines established from patients with Kearn Sayre Syndrome.

**Supplemental Figure 2: Mitochondrial gene sets are enriched in association with chimeric mitochondrial transcript frequency.**

Gene set enrichment analysis of differentially expressed genes associated with chimeric mitochondrial RNA frequency, adjusted for rat age and GPA treatment status in rat skeletal muscle aging.
