# Supplementary figures and images for: Chimeric mitochondrial RNA transcripts predict mitochondrial genome deletion mutations in mitochondrial genetic diseases and aging
Source: HighWire-hosted journal article supplement (doi:10.1101/gr.279072.124), 2024-11-27

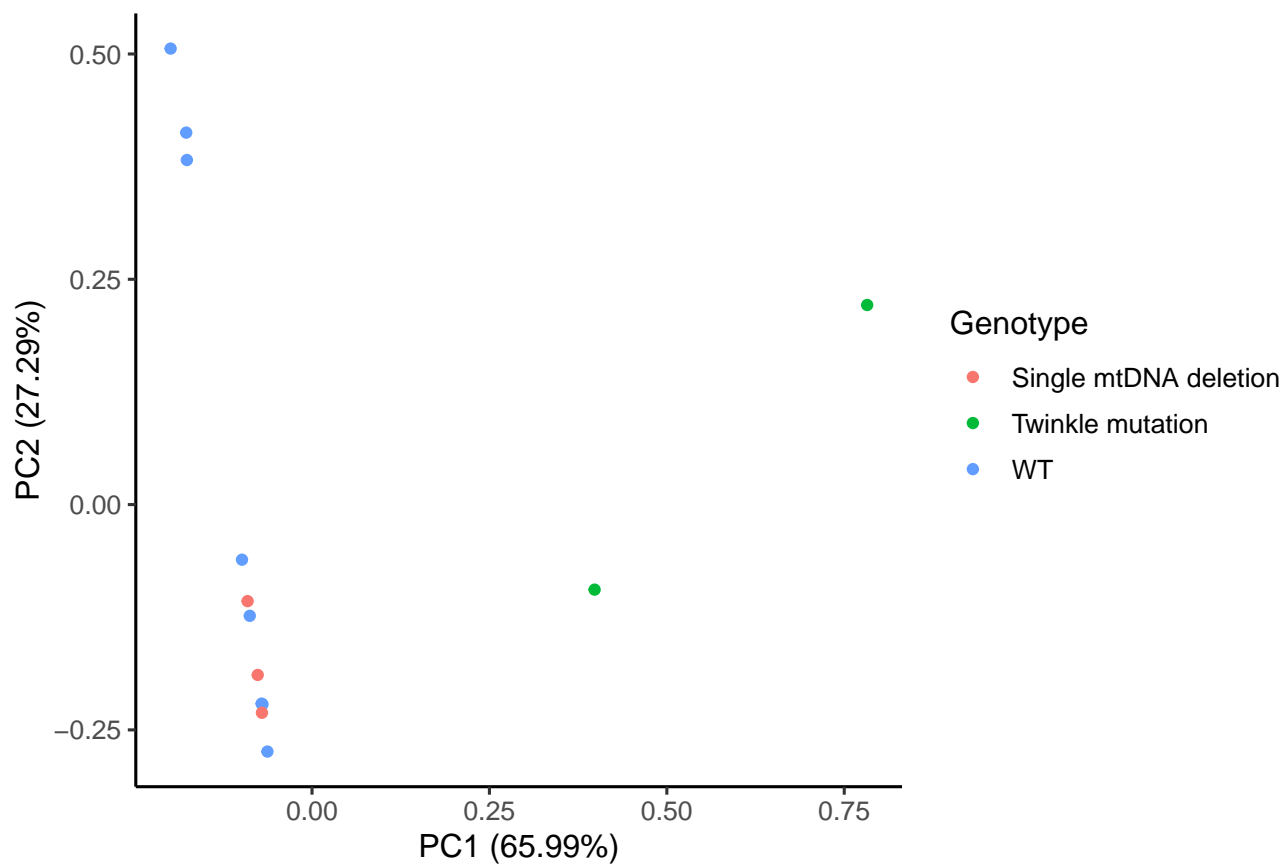

Supplement: Supplemental_Code.zip [file FFPM-PCA.pdf › chimeric-mitochondrial-RNA-analysis-1.0.0/star-fusion-results-summary/human-Twinkle-mutation/FFPM-PCA.pdf]

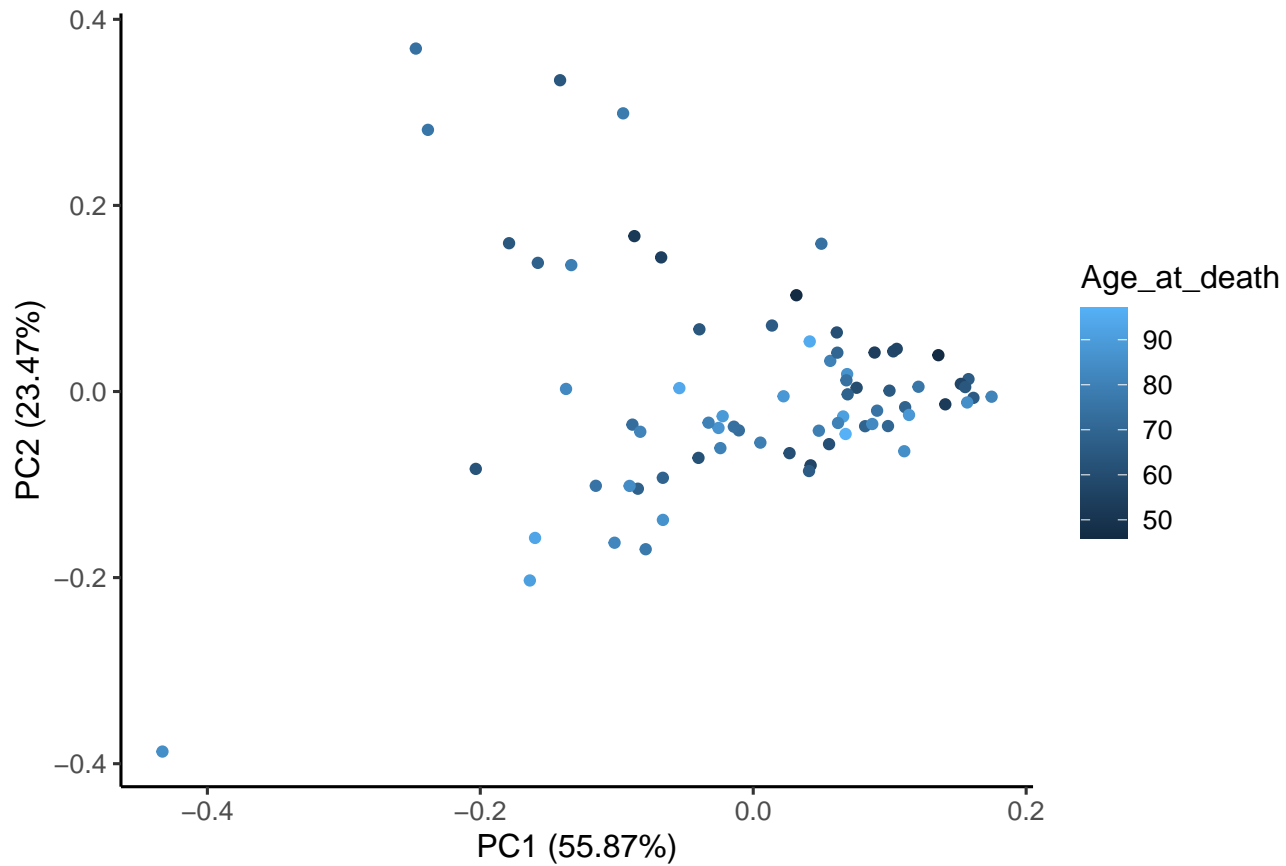

Supplement: Supplemental_Code.zip [file FFPM-PCA.pdf › chimeric-mitochondrial-RNA-analysis-1.0.0/star-fusion-results-summary/human-aging-brain/FFPM-PCA.pdf]

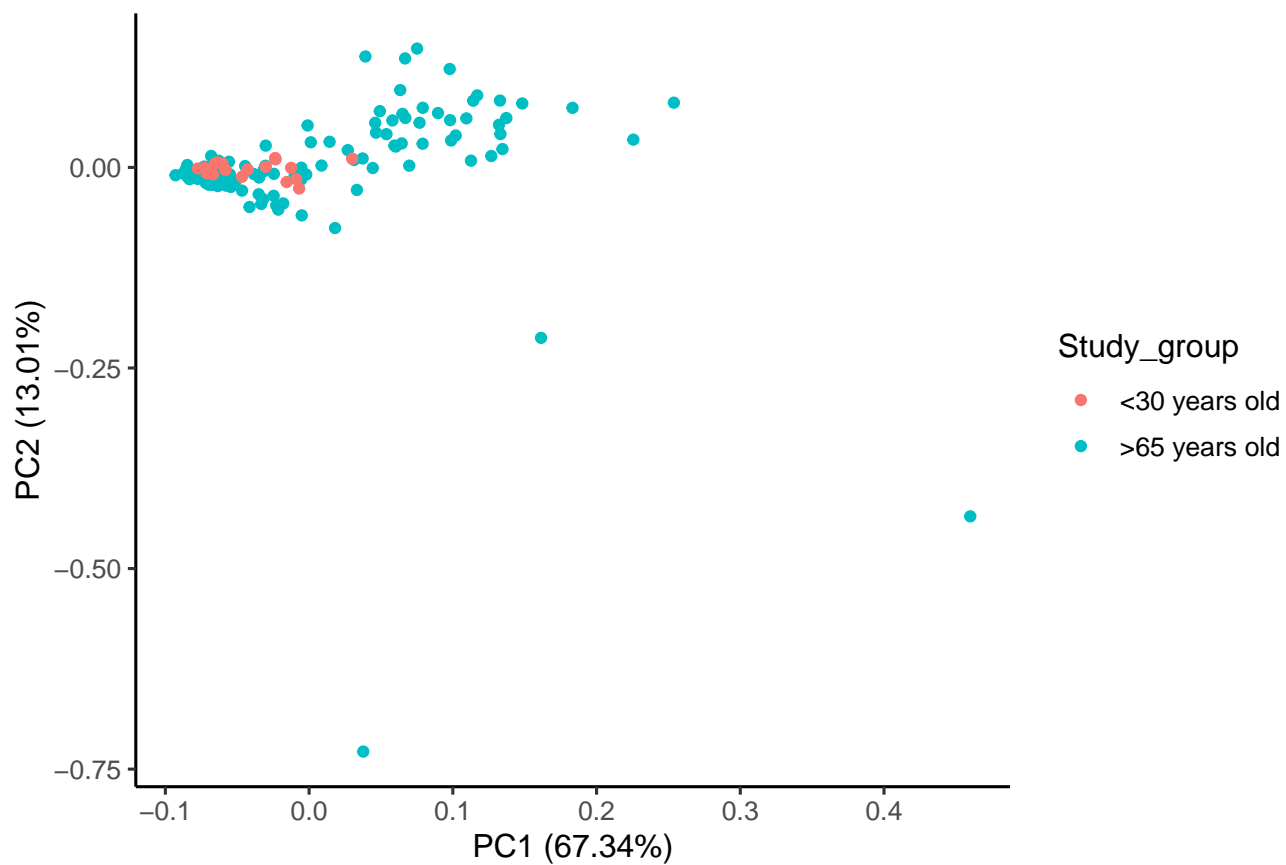

Supplement: Supplemental_Code.zip [file FFPM-PCA.pdf › chimeric-mitochondrial-RNA-analysis-1.0.0/star-fusion-results-summary/human-aging-muscle/FFPM-PCA.pdf]

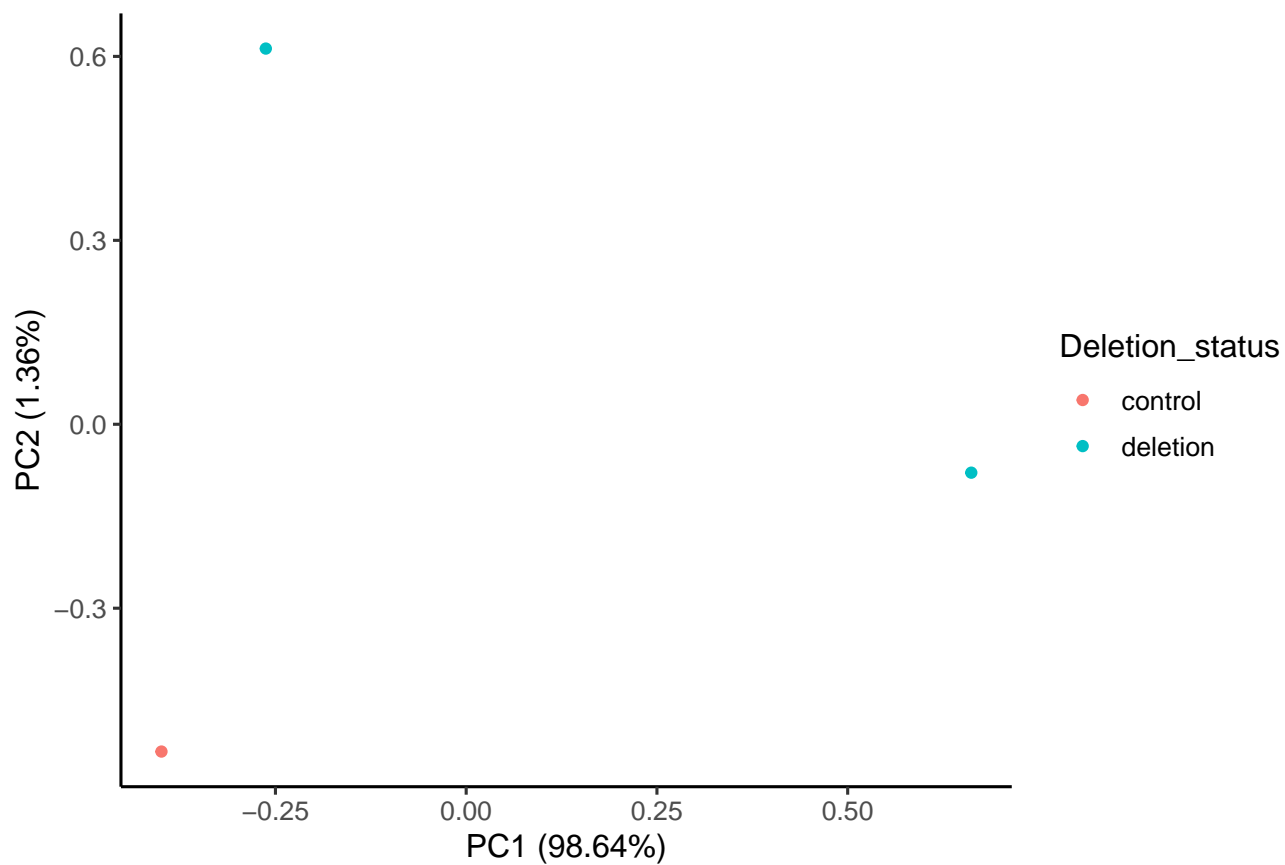

Supplement: Supplemental_Code.zip [file FFPM-PCA.pdf › chimeric-mitochondrial-RNA-analysis-1.0.0/star-fusion-results-summary/human-common-deletion/FFPM-PCA.pdf]

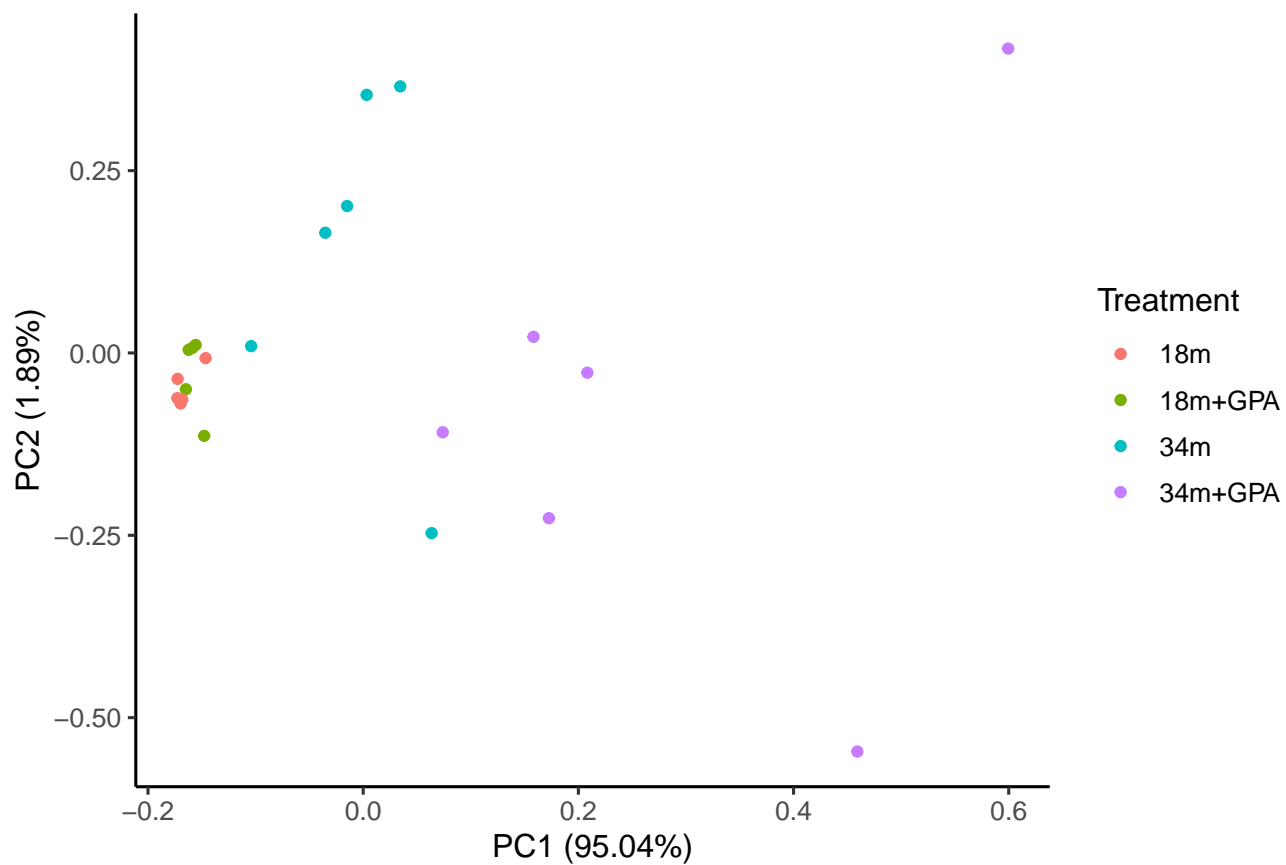

Supplement: Supplemental_Code.zip [file FFPM-PCA.pdf › chimeric-mitochondrial-RNA-analysis-1.0.0/star-fusion-results-summary/rat-aging-muscle/FFPM-PCA.pdf]
